# Supplementary material for: Topical Ophthalmic Anesthetics for Corneal Abrasions: Findings from a Cochrane Systematic Review and Meta-Analysis
Source: Research Square preprint supplement (doi:10.21203/rs.3.rs-4160700/v1), 2024-06-04
Supplement: Supplementary file 1 [file f2055452e4d7d351fd1cd29d.pdf]

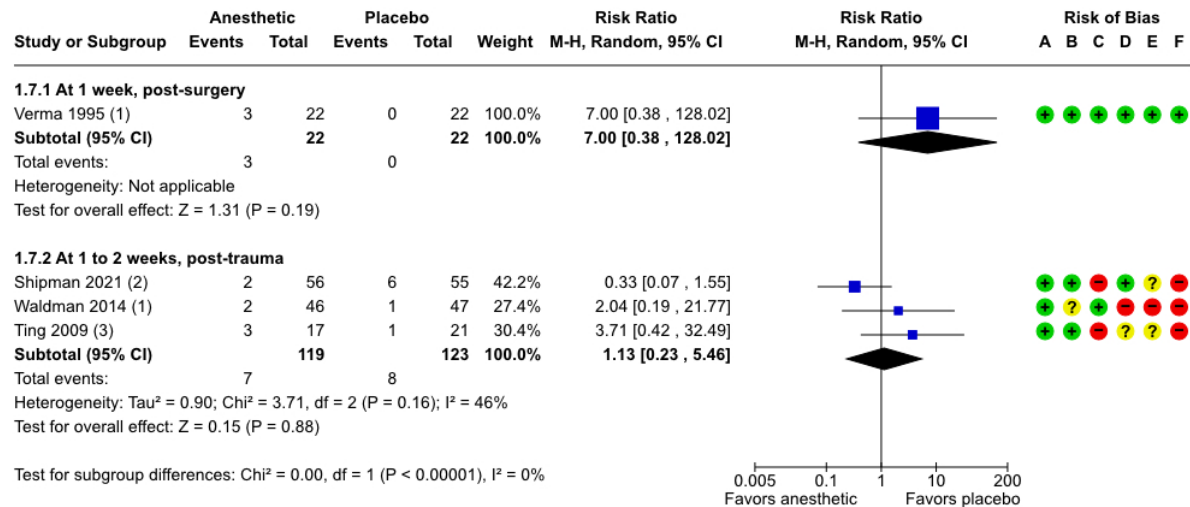

#### Footnotes

- (1) At 1 week, tetracaine 1%  
 (2) At 1 week, tetracaine 0.5%  
 (3) At 2 weeks, tetracaine 0.4%

#### Risk of bias legend

- (A) Bias arising from the randomization process  
 (B) Bias due to deviations from intended interventions  
 (C) Bias due to missing outcome data  
 (D) Bias in measurement of the outcome  
 (E) Bias in selection of the reported result  
 (F) Overall bias
